# Supplementary material for: Study of Codon Usage Patterns and Influencing Factors in Rice Yellow Mottle Virus Based on Coding Sequence Data
Source: MDPI journal article supplement (doi:10.3390/agronomy12091990), 2022-08-23
Supplement: s1 [file s1]

**Table S1:** Detailed information of RYMV isolates studied in this study.

| Number | Accession number | Isolate          | Length (bp) | Country       | Host             | Collection date |
|--------|------------------|------------------|-------------|---------------|------------------|-----------------|
| 1      | NC_001575        | CI4              | 4,449       | Cote d'Ivoire | NA               | 2018            |
| 2      | KM487713.1       | Ug230            | 4,447       | Uganda        | <i>O. sativa</i> | 2010            |
| 3      | KM487712.1       | Ug207            | 4,447       | Uganda        | <i>O. sativa</i> | 2010            |
| 4      | KM487711.1       | Ug148            | 4,447       | Uganda        | <i>O. sativa</i> | 2009            |
| 5      | KM487710.1       | Ug1              | 4,448       | Uganda        | <i>O. sativa</i> | 2000            |
| 6      | JX966248.1       | Tz1102           | 4,448       | Tanzania      | <i>O. sativa</i> | 2007            |
| 7      | JX966247.1       | Tz21             | 4,448       | Tanzania      | <i>O. sativa</i> | 2002            |
| 8      | JX966246.1       | Mg20             | 4,448       | Madagascar    | <i>O. sativa</i> | 2004            |
| 9      | JX966245.1       | Mg15             | 4,447       | Madagascar    | <i>O. sativa</i> | 2003            |
| 10     | JX966244.1       | Mg11             | 4,447       | Madagascar    | <i>O. sativa</i> | 2003            |
| 11     | JX961551.1       | Tz16             | 4,446       | Tanzania      | <i>O. sativa</i> | 2002            |
| 12     | FN432841.1       | Ng18             | 4,449       | Niger         | NA               | 2005            |
| 13     | FN432840.1       | Ma203            | 4,450       | Mali          | NA               | 1997            |
| 14     | FN432839.1       | Ke12             | 4,448       | Kenya         | NA               | 2008            |
| 15     | FN432838.1       | Ga4              | 4,450       | Gambia        | NA               | 2006            |
| 16     | FN432837.1       | Ch28             | 4,449       | Chad          | NA               | 2005            |
| 17     | AJ877020.1       | Tz18             | 4,446       | Tanzania      | NA               | 2002            |
| 18     | AJ876793.1       | Tz127            | 4,444       | Tanzania      | <i>O. sativa</i> | 1999            |
| 19     | AJ608219.1       | CIa <sup>4</sup> | 4,452       | Cote d'Ivoire | <i>O. sativa</i> | 1975            |
| 20     | AJ608218.1       | Tz8              | 4,449       | Tanzania      | <i>O. sativa</i> | 1996            |
| 21     | AJ608217.1       | Tz5              | 4,449       | Tanzania      | <i>O. sativa</i> | 1997            |
| 22     | AJ608216.1       | Tz3              | 4,457       | Tanzania      | <i>O. sativa</i> | 1997            |
| 23     | AJ608215.1       | Tz11             | 4,448       | Tanzania      | <i>O. sativa</i> | 2001            |
| 24     | AJ608214.1       | SL4              | 4,453       | Sierra Leone  | <i>O. sativa</i> | 1975            |
| 25     | AJ608213.1       | Ni2              | 4,449       | Nigeria       | <i>O. sativa</i> | 1980            |
| 26     | AJ608212.1       | Ni1              | 4,449       | Nigeria       | <i>O. sativa</i> | 1980            |
| 27     | AJ608211.1       | Mg2              | 4,447       | Madagascar    | <i>O. sativa</i> | 1991            |
| 28     | AJ608210.1       | Mg1              | 4,447       | Madagascar    | <i>O. sativa</i> | 1989            |
| 29     | AJ608209.1       | Ma77             | 4,450       | Mali          | <i>O. sativa</i> | 2000            |
| 30     | AJ608208.1       | Ma10             | 4,451       | Mali          | <i>O. sativa</i> | 1996            |
| 31     | AJ608207.1       | CI63             | 4,450       | Cote d'Ivoire | <i>O. sativa</i> | 1997            |
| 32     | AJ608206.1       | CI4              | 4,449       | Cote d'Ivoire | <i>O. sativa</i> | 1995            |
| 33     | U23142.1         | Nia              | 4,451       | Nigeria       | <i>O. sativa</i> | 1980            |
| 34     | AM883058.1       | Tz209            | 4,446       | Madagascar    | NA               | 2005            |
| 35     | AM883057.1       | Tz202            | 4,449       | Madagascar    | NA               | 2005            |
| 36     | AM883056.1       | Mg16             | 4,447       | Madagascar    | NA               | 2003            |
| 37     | MG599280         | Ke345            | 4,447       | Kenya         | <i>O. sativa</i> | 2016            |
| 38     | MG599279         | Ke323            | 4,447       | Kenya         | <i>O. sativa</i> | 2016            |
| 39     | MG599278         | Ke105            | 4448        | Kenya         | <i>O. sativa</i> | 2012            |
| 40     | MG599277         | Ke101            | 4448        | Kenya         | <i>O. sativa</i> | 2012            |
| 41     | MG599276         | Ke2              | 4446        | Kenya         | <i>O. sativa</i> | 1966            |
| 42     | MF989228         | Mw10             | 4449        | Malawi        | <i>O. sativa</i> | 2014            |
| 43     | MF784441         | Tg274            | 4449        | Togo          | <i>O. sativa</i> | 2014            |

|    |          |       |       |        |                  |      |
|----|----------|-------|-------|--------|------------------|------|
| 44 | MF784438 | Ng109 | 4449  | Niger  | <i>O. sativa</i> | 2007 |
| 45 | MF784437 | NA    | 4449  | Niger  | <i>O. sativa</i> | 2017 |
| 46 | MG599277 | NA    | 4448  | Keyna  | NA               | 2017 |
| 47 | MN233655 | NA    | 4450  | France | NA               | 2019 |
| 48 | MN233654 | NA    | 4450  | France | NA               | 2019 |
| 49 | MF784441 | NA    | 4449  | France | NA               | 2017 |
| 50 | L20893.1 | NA    | 4,450 | NA     | <i>O. sativa</i> | 1990 |
